# Supplementary material for: The Challenge of Diffusion Magnetic Resonance Imaging in Cerebral Palsy: A Proposed Method to Identify White Matter Pathways
Source: MDPI journal article supplement (doi:10.3390/brainsci13101386), 2023-09-29

Table S1. Presence (✓) or absence (✗) of the tracts for each participant. L and R respectively stands for left and right.

|                                                 |   | S1 | S2 | S3 | S4 | S5 | S6 | S7 | S8 |
|-------------------------------------------------|---|----|----|----|----|----|----|----|----|
| Anterior commissure                             |   | ✓  | ✓  | ✓  | ✓  | ✓  | ✓  | ✓  | ✓  |
| Arcuate fasciculus                              | L | ✓  | ✓  | ✓  | ✓  | ✗  | ✓  | ✓  | ✓  |
|                                                 | R | ✓  | ✓  | ✗  | ✓  | ✓  | ✗  | ✓  | ✓  |
| Corpus callosum, anterior part of frontal lobe  |   | ✓  | ✓  | ✓  | ✓  | ✓  | ✗  | ✓  | ✓  |
| Corpus callosum, posterior part of frontal lobe |   | ✓  | ✓  | ✓  | ✓  | ✓  | ✗  | ✓  | ✓  |
| Corpus callosum, occipital lobe                 |   | ✓  | ✓  | ✓  | ✓  | ✓  | ✗  | ✓  | ✓  |
| Corpus callosum, parietal lobe                  |   | ✓  | ✓  | ✓  | ✓  | ✓  | ✗  | ✓  | ✓  |
| Corpus callosum, pre-post central gyri          |   | ✓  | ✓  | ✓  | ✓  | ✓  | ✗  | ✓  | ✓  |
| Corpus callosum, temporal lobe                  |   | ✓  | ✗  | ✓  | ✓  | ✓  | ✗  | ✗  | ✗  |
| Cingulum                                        | L | ✓  | ✓  | ✗  | ✓  | ✓  | ✓  | ✓  | ✓  |
|                                                 | R | ✓  | ✓  | ✓  | ✓  | ✓  | ✗  | ✓  | ✓  |
| Frontal aslant tract                            | L | ✓  | ✗  | ✓  | ✓  | ✗  | ✓  | ✓  | ✓  |
|                                                 | R | ✓  | ✓  | ✗  | ✓  | ✓  | ✗  | ✓  | ✓  |
| Fronto pontine tract                            | L | ✓  | ✓  | ✓  | ✓  | ✓  | ✓  | ✓  | ✓  |
|                                                 | R | ✓  | ✓  | ✓  | ✓  | ✓  | ✗  | ✓  | ✓  |
| Fornix                                          | L | ✓  | ✓  | ✓  | ✓  | ✓  | ✓  | ✓  | ✓  |
|                                                 | R | ✓  | ✓  | ✓  | ✓  | ✓  | ✗  | ✓  | ✓  |
| Inferior fronto-occipital fasciculus            | L | ✓  | ✓  | ✓  | ✓  | ✓  | ✓  | ✓  | ✓  |
|                                                 | R | ✓  | ✓  | ✓  | ✓  | ✓  | ✗  | ✓  | ✓  |
| Inferior longitudinal fasciculus                | L | ✓  | ✓  | ✓  | ✓  | ✓  | ✓  | ✓  | ✓  |
|                                                 | R | ✓  | ✓  | ✓  | ✓  | ✓  | ✗  | ✓  | ✓  |
| Middle cerebellar peduncle                      |   | ✓  | ✓  | ✓  | ✓  | ✓  | ✓  | ✓  | ✓  |
| Middle longitudinal fascicle                    | L | ✓  | ✓  | ✓  | ✓  | ✓  | ✓  | ✓  | ✓  |
|                                                 | R | ✓  | ✓  | ✗  | ✓  | ✓  | ✓  | ✓  | ✓  |
| Optic radiation and Meyer's loop                | L | ✓  | ✓  | ✓  | ✓  | ✓  | ✓  | ✓  | ✓  |
|                                                 | R | ✓  | ✓  | ✓  | ✓  | ✓  | ✗  | ✓  | ✓  |
| Posterior comissure                             |   | ✓  | ✓  | ✓  | ✓  | ✗  | ✓  | ✓  | ✓  |
| Parieto-occipito pontine tract                  | L | ✓  | ✓  | ✓  | ✓  | ✓  | ✓  | ✓  | ✓  |
|                                                 | R | ✓  | ✓  | ✗  | ✓  | ✓  | ✗  | ✓  | ✓  |
| Pyramidal tract                                 | L | ✓  | ✓  | ✓  | ✓  | ✓  | ✓  | ✓  | ✓  |
|                                                 | R | ✓  | ✓  | ✓  | ✓  | ✓  | ✗  | ✓  | ✓  |
| Superior cerebellar peduncle                    | L | ✓  | ✓  | ✓  | ✓  | ✓  | ✓  | ✓  | ✓  |
|                                                 | R | ✓  | ✓  | ✓  | ✓  | ✓  | ✓  | ✓  | ✓  |
| Superior longitudinal fasciculus                | L | ✓  | ✓  | ✓  | ✓  | ✗  | ✓  | ✓  | ✓  |
|                                                 | R | ✓  | ✓  | ✗  | ✓  | ✓  | ✓  | ✓  | ✓  |
| Uncinate fasciculus                             | L | ✓  | ✓  | ✓  | ✓  | ✓  | ✓  | ✓  | ✓  |
|                                                 | R | ✓  | ✓  | ✓  | ✓  | ✓  | ✗  | ✓  | ✓  |

Table S2. Overall results for left and right CST tracts (lCST, rCST) for the participants. The mean value (and the standard deviation) is presented for A) the volume and DTI metrics (i.e., FA, MD, RD, AD), B) the fODF metrics (i.e., AFD total and NuFO) and C) the NODDI metrics (i.e., OD, ICVF, ISOVF). The AI is computed between the controlesional and the ipsilesional side for each metric.

**A) Volume and DTI metrics**

|           | Volume (in mm <sup>3</sup> ) |         |              | FA             |                |              | MD                 |                    |              | RD                 |                    |              | AD                 |                    |              |
|-----------|------------------------------|---------|--------------|----------------|----------------|--------------|--------------------|--------------------|--------------|--------------------|--------------------|--------------|--------------------|--------------------|--------------|
|           | lCST                         | rCST    | AI           | lCST           | rCST           | AI           | lCST               | rCST               | AI           | lCST               | rCST               | AI           | lCST               | rCST               | AI           |
| <b>S1</b> | 59061                        | 42190   | <b>0.17</b>  | 0.58<br>(0.17) | 0.54<br>(0.17) | <b>0.04</b>  | 0.0007<br>(0.0002) | 0.0008<br>(0.0003) | <b>-0.06</b> | 0.0005<br>(0.0002) | 0.0005<br>(0.0003) | <b>-0.09</b> | 0.0013<br>(0.0003) | 0.0014<br>(0.0004) | <b>-0.04</b> |
| <b>S2</b> | 32783                        | 73372   | <b>-0.38</b> | 0.46<br>(0.17) | 0.53<br>(0.17) | <b>-0.07</b> | 0.0009<br>(0.0003) | 0.0007<br>(0.0002) | <b>0.12</b>  | 0.0007<br>(0.0003) | 0.0005<br>(0.0002) | <b>0.16</b>  | 0.0014<br>(0.0004) | 0.0012<br>(0.0003) | <b>0.09</b>  |
| <b>S3</b> | 69756                        | 28592   | <b>0.42</b>  | 0.48<br>(0.18) | 0.52<br>(0.19) | <b>-0.03</b> | 0.0008<br>(0.0004) | 0.0009<br>(0.0003) | <b>-0.02</b> | 0.0006<br>(0.0004) | 0.0006<br>(0.0003) | <b>0.02</b>  | 0.0013<br>(0.0005) | 0.0014<br>(0.0004) | <b>-0.05</b> |
| <b>S4</b> | 72236                        | 70685   | <b>0.01</b>  | 0.51<br>(0.17) | 0.52<br>(0.17) | <b>-0.01</b> | 0.0008<br>(0.0004) | 0.0008<br>(0.0003) | <b>0.01</b>  | 0.0005<br>(0.0004) | 0.0005<br>(0.0003) | <b>0.02</b>  | 0.0013<br>(0.0005) | 0.0013<br>(0.0004) | <b>0.01</b>  |
| <b>S5</b> | 50380                        | 70970   | <b>-0.17</b> | 0.49<br>(0.16) | 0.53<br>(0.18) | <b>-0.04</b> | 0.0009<br>(0.0003) | 0.0008<br>(0.0002) | <b>0.06</b>  | 0.0006<br>(0.0003) | 0.0005<br>(0.0002) | <b>0.09</b>  | 0.0014<br>(0.0004) | 0.0013<br>(0.0003) | <b>0.03</b>  |
| <b>S6</b> | 70482                        | No data |              | 0.48<br>(0.17) | No data        |              | 0.0008<br>(0.0005) | No data            |              | 0.0006<br>(0.0004) | No data            |              | 0.0013<br>(0.0006) | No data            |              |
| <b>S7</b> | 72841                        | 65878   | <b>0.05</b>  | 0.54<br>(0.17) | 0.51<br>(0.17) | <b>0.02</b>  | 0.0007<br>(0.0002) | 0.0008<br>(0.0002) | <b>-0.03</b> | 0.0005<br>(0.0002) | 0.0005<br>(0.0002) | <b>0.00</b>  | 0.0012<br>(0.0003) | 0.0013<br>(0.0004) | <b>-0.04</b> |
| <b>S8</b> | 57038                        | 32673   | <b>0.27</b>  | 0.48<br>(0.16) | 0.43<br>(0.15) | <b>0.06</b>  | 0.0008<br>(0.0003) | 0.0010<br>(0.0004) | <b>-0.09</b> | 0.0006<br>(0.0003) | 0.0007<br>(0.0004) | <b>0.07</b>  | 0.0012<br>(0.0004) | 0.0014<br>(0.0005) | <b>-0.08</b> |

### B) fODF metrics

|           | AFDtotal        |                 |              | NuFO           |                |              |
|-----------|-----------------|-----------------|--------------|----------------|----------------|--------------|
|           | ICST            | rCST            | AI           | ICST           | rCST           | AI           |
| <b>S1</b> | 0.36<br>(0.058) | 0.34<br>(0.52)  | <b>0.03</b>  | 1.29<br>(0.53) | 1.27<br>(0.51) | <b>0.01</b>  |
| <b>S2</b> | 0.34<br>(0.049) | 0.40<br>(0.062) | <b>-0.07</b> | 1.42<br>(0.66) | 1.57<br>(0.67) | <b>-0.05</b> |
| <b>S3</b> | 0.36<br>(0.067) | 0.34<br>(0.051) | <b>0.03</b>  | 1.54<br>(0.70) | 1.26<br>(0.53) | <b>0.10</b>  |
| <b>S4</b> | 0.35<br>(0.051) | 0.36<br>(0.055) | <b>-0.01</b> | 1.50<br>(0.70) | 1.51<br>(0.68) | <b>0.00</b>  |
| <b>S5</b> | 0.31<br>(0.04)  | 0.34<br>(0.06)  | <b>-0.04</b> | 1.39<br>(0.60) | 1.38<br>(0.61) | <b>0.00</b>  |
| <b>S6</b> | 0.34<br>(0.06)  | No<br>data      |              | 1.52<br>(0.66) | No<br>data     |              |
| <b>S7</b> | 0.91<br>(0.40)  | 0.87<br>(0.38)  | <b>-0.02</b> | 1.30<br>(0.52) | 1.25<br>(0.50) | <b>-0.02</b> |
| <b>S8</b> | 0.75<br>(0.32)  | 0.70<br>(0.35)  | <b>0.03</b>  | 1.37<br>(0.60) | 1.22<br>(0.54) | <b>0.06</b>  |

### C) NODDI metrics

|           | ICST           | OD<br>rCST     | AI           | ICST           | ICVF<br>rCST   | AI           | ICST           | ISOVF<br>rCST  | AI           |
|-----------|----------------|----------------|--------------|----------------|----------------|--------------|----------------|----------------|--------------|
| <b>S1</b> | 0.15<br>(0.12) | 0.15<br>(0.12) | <b>0.00</b>  | 0.65<br>(0.11) | 0.60<br>(0.12) | <b>0.04</b>  | 0.10<br>(0.12) | 0.14<br>(0.16) | <b>-0.09</b> |
| <b>S2</b> | 0.17<br>(0.14) | 0.19<br>(0.12) | <b>0.07</b>  | 0.52<br>(0.15) | 0.67<br>(0.12) | <b>0.13</b>  | 0.14<br>(0.18) | 0.10<br>(0.10) | <b>0.16</b>  |
| <b>S3</b> | 0.20<br>(0.15) | 0.14<br>(0.13) | <b>0.16</b>  | 0.63<br>(0.16) | 0.53<br>(0.14) | <b>0.08</b>  | 0.15<br>(0.19) | 0.11<br>(0.17) | <b>0.02</b>  |
| <b>S4</b> | 0.19<br>(0.14) | 0.18<br>(0.13) | <b>0.03</b>  | 0.63<br>(0.13) | 0.62<br>(0.12) | <b>0.00</b>  | 0.13<br>(0.15) | 0.12<br>(0.14) | <b>0.02</b>  |
| <b>S5</b> | 0.16<br>(0.13) | 0.16<br>(0.12) | <b>0.01</b>  | 0.55<br>(0.15) | 0.61<br>(0.12) | <b>0.06</b>  | 0.14<br>(0.16) | 0.10<br>(0.14) | <b>0.09</b>  |
| <b>S6</b> | 0.20<br>(0.15) | No<br>data     |              | 0.63<br>(0.16) | No data        |              | 0.15<br>(0.18) | No data        |              |
| <b>S7</b> | 0.17<br>(0.12) | 0.17<br>(0.13) | <b>-0.01</b> | 0.64<br>(0.11) | 0.58<br>(0.12) | <b>0.05</b>  | 0.10<br>(0.11) | 0.09<br>(0.14) | <b>0.05</b>  |
| <b>S8</b> | 0.20<br>(0.13) | 0.18<br>(0.14) | <b>-0.04</b> | 0.59<br>(0.13) | 0.50<br>(0.18) | <b>-0.08</b> | 0.11<br>(0.16) | 0.16<br>(0.21) | <b>0.19</b>  |

Table S3. Overall results for the six sections of the corpus callosum (CC\_Fr1 and CC\_Fr2: Frontal projections, CC\_Pr\_Po: Pre- and post-central gyri, CC\_Pa: parietal, CC\_Te: Temporal, CC\_Oc: occipital) for the participants. The mean value (and the standard deviation) is presented for the FA, MD, RD, AD, AFD totale and NuFO metrics. The total volume is indicated for each tract in mm<sup>3</sup>.

**A) Volume and DTI metrics**

|           | Volume (in mm <sup>3</sup> ) |        |          |       |         |       | FA             |                |                |                |                |                |
|-----------|------------------------------|--------|----------|-------|---------|-------|----------------|----------------|----------------|----------------|----------------|----------------|
|           | CC_Fr1                       | CC_Fr2 | CC_Pr_Po | CC_Pa | CC_Te   | CC_Oc | CC_Fr1         | CC_Fr2         | CC_Pr_Po       | CC_Pa          | CC_Te          | CC_Oc          |
| <b>S1</b> | 58388                        | 51361  | 45769    | 53679 | 5167    | 51133 | 0.49<br>(0.17) | 0.44<br>(0.15) | 0.51<br>(0.17) | 0.53<br>(0.19) | 0.53<br>(0.18) | 0.56<br>(0.19) |
| <b>S2</b> | 37228                        | 51636  | 47566    | 31578 | 1761    | 42337 | 0.51<br>(0.19) | 0.48<br>(0.18) | 0.51<br>(0.18) | 0.57<br>(0.21) | 0.52<br>(0.18) | 0.64<br>(0.21) |
| <b>S3</b> | 41769                        | 3808   | 24103    | 11242 | 11151   | 15582 | 0.44<br>(0.17) | 0.43<br>(0.15) | 0.43<br>(0.14) | 0.47<br>(0.19) | 0.51<br>(0.14) | 0.59<br>(0.20) |
| <b>S4</b> | 69411                        | 81435  | 69396    | 56006 | 7627    | 35025 | 0.46<br>(0.17) | 0.49<br>(0.18) | 0.50<br>(0.17) | 0.52<br>(0.19) | 0.57<br>(0.17) | 0.61<br>(0.21) |
| <b>S5</b> | 37610                        | 39391  | 60558    | 62447 | 1607    | 54212 | 0.45<br>(0.17) | 0.39<br>(0.14) | 0.49<br>(0.17) | 0.52<br>(0.18) | 0.49<br>(0.18) | 0.58<br>(0.19) |
| <b>S6</b> | No data                      |        |          |       |         |       | No data        |                |                |                |                |                |
| <b>S7</b> | 85177                        | 120929 | 81646    | 72994 | No data | 53327 | 0.47<br>(0.18) | 0.49<br>(0.18) | 0.52<br>(0.18) | 0.53<br>(0.20) | No data        | 0.55<br>(0.21) |
| <b>S8</b> | 54560                        | 14458  | 27568    | 48199 | 223     | 30579 | 0.42<br>(0.17) | 0.31<br>(0.13) | 0.42<br>(0.18) | 0.45<br>(0.19) | 0.39<br>(0.17) | 0.44<br>(0.17) |

|           | MD                 |                    |                    |                    |                    |                    | RD                 |                    |                    |                    |                    |                    | AD                 |                    |                    |                    |                    |                    |
|-----------|--------------------|--------------------|--------------------|--------------------|--------------------|--------------------|--------------------|--------------------|--------------------|--------------------|--------------------|--------------------|--------------------|--------------------|--------------------|--------------------|--------------------|--------------------|
|           | CC_Fr1             | CC_Fr2             | CC_Pr_Po           | CC_Pa              | CC_Te              | CC_Oc              | CC_Fr1             | CC_Fr2             | CC_Pr_Po           | CC_Pa              | CC_Te              | CC_Oc              | CC_Fr1             | CC_Fr2             | CC_Pr_Po           | CC_Pa              | CC_Te              | CC_Oc              |
| <b>S1</b> | 0.0008<br>(0.0002) | 0.0009<br>(0.0003) | 0.0009<br>(0.0004) | 0.0008<br>(0.0002) | 0.0008<br>(0.0002) | 0.0008<br>(0.0003) | 0.0006<br>(0.0002) | 0.0007<br>(0.0003) | 0.0006<br>(0.0003) | 0.0005<br>(0.0002) | 0.0005<br>(0.0002) | 0.0005<br>(0.0003) | 0.0013<br>(0.0003) | 0.0014<br>(0.0004) | 0.0014<br>(0.0005) | 0.0014<br>(0.0004) | 0.0014<br>(0.0004) | 0.0015<br>(0.0004) |
| <b>S2</b> | 0.0008<br>(0.0002) | 0.0008<br>(0.0003) | 0.0009<br>(0.0004) | 0.0008<br>(0.0001) | 0.0009<br>(0.0003) | 0.0008<br>(0.0002) | 0.0005<br>(0.0002) | 0.0006<br>(0.0002) | 0.0006<br>(0.0003) | 0.0005<br>(0.0002) | 0.0006<br>(0.0003) | 0.0004<br>(0.0002) | 0.0013<br>(0.0004) | 0.0013<br>(0.0004) | 0.0014<br>(0.0006) | 0.0014<br>(0.0003) | 0.0014<br>(0.0005) | 0.0015<br>(0.0004) |
| <b>S3</b> | 0.0009<br>(0.0002) | 0.0011<br>(0.0005) | 0.0011<br>(0.0005) | 0.0009<br>(0.0002) | 0.0009<br>(0.0003) | 0.0008<br>(0.0002) | 0.0007<br>(0.0002) | 0.0008<br>(0.0004) | 0.0008<br>(0.0005) | 0.0006<br>(0.0002) | 0.0006<br>(0.0003) | 0.0005<br>(0.0002) | 0.0014<br>(0.0003) | 0.0016<br>(0.0006) | 0.0016<br>(0.0007) | 0.0014<br>(0.0004) | 0.0015<br>(0.0004) | 0.0015<br>(0.0004) |
| <b>S4</b> | 0.0009<br>(0.0002) | 0.0008<br>(0.0003) | 0.0009<br>(0.0003) | 0.0008<br>(0.0002) | 0.0008<br>(0.0002) | 0.0008<br>(0.0001) | 0.0006<br>(0.0002) | 0.0006<br>(0.0003) | 0.0006<br>(0.0003) | 0.0005<br>(0.0002) | 0.0005<br>(0.0003) | 0.0005<br>(0.0002) | 0.0014<br>(0.0004) | 0.0013<br>(0.0004) | 0.0014<br>(0.0005) | 0.0014<br>(0.0003) | 0.0014<br>(0.0004) | 0.0015<br>(0.0003) |
| <b>S5</b> | 0.0009<br>(0.0002) | 0.0010<br>(0.0003) | 0.0009<br>(0.0003) | 0.0008<br>(0.0002) | 0.0009<br>(0.0002) | 0.0008<br>(0.0002) | 0.0006<br>(0.0002) | 0.0007<br>(0.0003) | 0.0006<br>(0.0003) | 0.0006<br>(0.0002) | 0.0006<br>(0.0003) | 0.0005<br>(0.0002) | 0.0014<br>(0.0004) | 0.0014<br>(0.0005) | 0.0014<br>(0.0005) | 0.0014<br>(0.0004) | 0.0014<br>(0.0004) | 0.0015<br>(0.0004) |
| <b>S6</b> | No data            |                    |                    |                    |                    |                    | No data            |                    |                    |                    |                    |                    | No data            |                    |                    |                    |                    |                    |
| <b>S7</b> | 0.0008<br>(0.0002) | 0.0008<br>(0.0002) | 0.0008<br>(0.0003) | 0.0008<br>(0.0002) | No data            | 0.0009<br>(0.0004) | 0.0006<br>(0.0002) | 0.0006<br>(0.0002) | 0.0006<br>(0.0003) | 0.0005<br>(0.0002) | No data            | 0.0006<br>(0.0004) | 0.0013<br>(0.0003) | 0.0013<br>(0.0004) | 0.0013<br>(0.0005) | 0.0013<br>(0.0003) | No data            | 0.0016<br>(0.0006) |
| <b>S8</b> | 0.0009<br>(0.0002) | 0.0012<br>(0.0005) | 0.0010<br>(0.0003) | 0.0009<br>(0.0002) | 0.0012<br>(0.0006) | 0.0010<br>(0.0004) | 0.0007<br>(0.0002) | 0.0010<br>(0.0005) | 0.0008<br>(0.0003) | 0.0006<br>(0.0002) | 0.0009<br>(0.0006) | 0.0008<br>(0.0004) | 0.0014<br>(0.0004) | 0.0015<br>(0.0006) | 0.0015<br>(0.0005) | 0.0014<br>(0.0004) | 0.0017<br>(0.0006) | 0.0016<br>(0.0005) |

B) fODF metrics

|           | AFDtotal       |                |                |                |                |                | NuFO           |                |                |                |                |                |
|-----------|----------------|----------------|----------------|----------------|----------------|----------------|----------------|----------------|----------------|----------------|----------------|----------------|
|           | CC_Fr1         | CC_Fr2         | CC_Pr_Po       | CC_Pa          | CC_Te          | CC_Oc          | CC_Fr1         | CC_Fr2         | CC_Pr_Po       | CC_Pa          | CC_Te          | CC_Oc          |
| <b>S1</b> | 0.25<br>(0.02) | 0.28<br>(0.03) | 0.32<br>(0.04) | 0.32<br>(0.04) | 0.32<br>(0.03) | 0.33<br>(0.05) | 1.11<br>(0.46) | 1.14<br>(0.47) | 1.27<br>(0.55) | 1.22<br>(0.52) | 1.38<br>(0.58) | 1.19<br>(0.48) |
| <b>S2</b> | 0.26<br>(0.03) | 0.30<br>(0.03) | 0.32<br>(0.04) | 0.32<br>(0.03) | 0.32<br>(0.04) | 0.36<br>(0.03) | 1.19<br>(0.53) | 1.30<br>(0.69) | 1.39<br>(0.61) | 1.29<br>(0.57) | 1.43<br>(0.75) | 1.24<br>(0.55) |
| <b>S3</b> | 0.21<br>(0.06) | 0.28<br>(0.04) | 0.30<br>(0.05) | 0.30<br>(0.03) | 0.31<br>(0.04) | 0.31<br>(0.03) | 0.81<br>(0.56) | 1.23<br>(0.51) | 1.32<br>(0.57) | 1.32<br>(0.59) | 1.37<br>(0.58) | 1.19<br>(0.45) |
| <b>S4</b> | 0.26<br>(0.05) | 0.33<br>(0.04) | 0.35<br>(0.04) | 0.33<br>(0.03) | 0.34<br>(0.03) | 0.34<br>(0.04) | 1.11<br>(0.62) | 1.39<br>(0.63) | 1.48<br>(0.70) | 1.37<br>(0.64) | 1.53<br>(0.72) | 1.25<br>(0.55) |
| <b>S5</b> | 0.23<br>(0.04) | 0.25<br>(0.03) | 0.29<br>(0.03) | 0.29<br>(0.02) | 0.30<br>(0.03) | 0.32<br>(0.04) | 1.16<br>(0.55) | 1.30<br>(0.58) | 1.35<br>(0.59) | 1.31<br>(0.56) | 1.51<br>(0.66) | 1.31<br>(0.57) |
| <b>S6</b> | No data        |                |                |                |                |                | No data        |                |                |                |                |                |
| <b>S7</b> | 0.63<br>(0.32) | 0.70<br>(0.33) | 0.87<br>(0.38) | 0.80<br>(0.40) | No data        | 0.95<br>(0.45) | 1.02<br>(0.45) | 1.15<br>(0.45) | 1.22<br>(0.48) | 1.20<br>(0.47) | No data        | 0.95<br>(0.45) |
| <b>S8</b> | 0.63<br>(0.31) | 0.53<br>(0.25) | 0.72<br>(0.32) | 0.68<br>(0.30) | 0.63<br>(0.40) | 0.72<br>(0.32) | 1.17<br>(0.59) | 1.16<br>(0.58) | 1.27<br>(0.56) | 1.35<br>(0.61) | 1.26<br>(0.65) | 1.24<br>(0.54) |

### C) NODDI metrics

|           | OD             |                |                |                |                |                | ICVF           |                |                |                |                |                | ISOVF          |                |                |                |                |                |
|-----------|----------------|----------------|----------------|----------------|----------------|----------------|----------------|----------------|----------------|----------------|----------------|----------------|----------------|----------------|----------------|----------------|----------------|----------------|
|           | CC_F1          | CC_F2          | CC_Pr_Po       | CC_Pa          | CC_Te          | CC_Oc          | CC_F1          | CC_F2          | CC_Pr_Po       | CC_Pa          | CC_Te          | CC_Oc          | CC_F1          | CC_F2          | CC_Pr_Po       | CC_Pa          | CC_Te          | CC_Oc          |
| <b>S1</b> | 0.17<br>(0.11) | 0.17<br>(0.13) | 0.14<br>(0.14) | 0.15<br>(0.13) | 0.16<br>(0.13) | 0.16<br>(0.13) | 0.55<br>(0.13) | 0.52<br>(0.12) | 0.59<br>(0.14) | 0.59<br>(0.12) | 0.60<br>(0.13) | 0.60<br>(0.14) | 0.12<br>(0.14) | 0.16<br>(0.20) | 0.16<br>(0.21) | 0.13<br>(0.15) | 0.14<br>(0.16) | 0.15<br>(0.18) |
| <b>S2</b> | 0.18<br>(0.13) | 0.18<br>(0.14) | 0.11<br>(0.15) | 0.15<br>(0.13) | 0.17<br>(0.15) | 0.17<br>(0.11) | 0.61<br>(0.15) | 0.58<br>(0.12) | 0.60<br>(0.13) | 0.61<br>(0.11) | 0.63<br>(0.15) | 0.64<br>(0.13) | 0.13<br>(0.15) | 0.15<br>(0.17) | 0.17<br>(0.21) | 0.10<br>(0.11) | 0.18<br>(0.20) | 0.11<br>(0.12) |
| <b>S3</b> | 0.19<br>(0.15) | 0.16<br>(0.16) | 0.12<br>(0.18) | 0.16<br>(0.14) | 0.17<br>(0.14) | 0.15<br>(0.12) | 0.54<br>(0.14) | 0.54<br>(0.20) | 0.55<br>(0.19) | 0.50<br>(0.12) | 0.54<br>(0.17) | 0.59<br>(0.15) | 0.18<br>(0.16) | 0.24<br>(0.29) | 0.26<br>(0.29) | 0.13<br>(0.17) | 0.16<br>(0.18) | 0.14<br>(0.14) |
| <b>S4</b> | 0.18<br>(0.14) | 0.17<br>(0.13) | 0.12<br>(0.15) | 0.15<br>(0.12) | 0.16<br>(0.12) | 0.14<br>(0.11) | 0.54<br>(0.13) | 0.57<br>(0.13) | 0.59<br>(0.13) | 0.56<br>(0.14) | 0.60<br>(0.15) | 0.61<br>(0.15) | 0.16<br>(0.16) | 0.13<br>(0.17) | 0.15<br>(0.20) | 0.12<br>(0.13) | 0.13<br>(0.14) | 0.12<br>(0.10) |
| <b>S5</b> | 0.16<br>(0.14) | 0.18<br>(0.14) | 0.13<br>(0.14) | 0.14<br>(0.12) | 0.15<br>(0.13) | 0.17<br>(0.12) | 0.45<br>(0.12) | 0.45<br>(0.13) | 0.54<br>(0.14) | 0.53<br>(0.12) | 0.54<br>(0.14) | 0.59<br>(0.15) | 0.10<br>(0.14) | 0.15<br>(0.20) | 0.14<br>(0.19) | 0.11<br>(0.13) | 0.13<br>(0.17) | 0.13<br>(0.15) |
| <b>S6</b> | No data        |                |                |                |                |                | No data        |                |                |                |                |                | No data        |                |                |                |                |                |
| <b>S7</b> | 0.18<br>(0.13) | 0.18<br>(0.13) | 0.16<br>(0.14) | 0.16<br>(0.13) | No data        | 0.14<br>(0.16) | 0.50<br>(0.12) | 0.53<br>(0.12) | 0.56<br>(0.12) | 0.55<br>(0.14) | No data        | 0.55<br>(0.19) | 0.10<br>(0.13) | 0.09<br>(0.15) | 0.11<br>(0.18) | 0.08<br>(0.11) | No data        | 0.16<br>(0.23) |
| <b>S8</b> | 0.19<br>(0.14) | 0.26<br>(0.17) | 0.19<br>(0.15) | 0.19<br>(0.14) | 0.22<br>(0.23) | 0.17<br>(0.15) | 0.50<br>(0.14) | 0.52<br>(0.23) | 0.56<br>(0.22) | 0.53<br>(0.16) | 0.49<br>(0.19) | 0.53<br>(0.19) | 0.18<br>(0.17) | 0.30<br>(0.32) | 0.26<br>(0.26) | 0.16<br>(0.16) | 0.32<br>(0.32) | 0.22<br>(0.25) |



Table S4. Overall results for left and right ML tracts (IML, rML) for the participants. The mean value (and the standard deviation) is presented for the FA, MD, RD, AD, AFD totale and NuFO metrics. The total volume is indicated for each tract in mm<sup>3</sup>. The AI is computed between the controlesional and the ipsilesional side for each metric.

**A) Volume and DTI metrics**

|           | Volume (in mm <sup>3</sup> ) |       |               | FA             |                |              | MD                 |                    |              | RD                 |                    |              | AD                 |                    |              |
|-----------|------------------------------|-------|---------------|----------------|----------------|--------------|--------------------|--------------------|--------------|--------------------|--------------------|--------------|--------------------|--------------------|--------------|
|           | IML                          | rML   | AI            | IML            | rML            | AI           | IML                | rML                | AI           | IML                | rML                | AI           | IML                | rML                | AI           |
| <b>S1</b> | 9408                         | 6359  | <b>0.19</b>   | 0.54<br>(0.15) | 0.53<br>(0.15) | <b>0.00</b>  | 0.0007<br>(0.0002) | 0.0008<br>(0.0003) | <b>-0.04</b> | 0.0005<br>(0.0002) | 0.0005<br>(0.0003) | <b>-0.04</b> | 0.0012<br>(0.0003) | 0.0013<br>(0.0004) | <b>-0.04</b> |
| <b>S2</b> | 7087                         | 13907 | <b>0.32</b>   | 0.46<br>(0.15) | 0.51<br>(0.14) | <b>0.06</b>  | 0.0009<br>(0.0003) | 0.0007<br>(0.0001) | <b>-0.11</b> | 0.0006<br>(0.0003) | 0.0005<br>(0.0001) | <b>-0.14</b> | 0.0014<br>(0.0004) | 0.0012<br>(0.0002) | <b>-0.09</b> |
| <b>S3</b> | 13129                        | 7399  | <b>0.28</b>   | 0.46<br>(0.15) | 0.49<br>(0.14) | <b>-0.03</b> | 0.0008<br>(0.0002) | 0.0010<br>(0.0004) | <b>-0.13</b> | 0.0006<br>(0.0004) | 0.0007<br>(0.0003) | <b>-0.11</b> | 0.0012<br>(0.0003) | 0.0014<br>(0.0005) | <b>-0.14</b> |
| <b>S4</b> | 9939                         | 11697 | <b>-0.08</b>  | 0.51<br>(0.14) | 0.53<br>(0.14) | <b>-0.02</b> | 0.0008<br>(0.0002) | 0.0007<br>(0.0002) | <b>0.01</b>  | 0.0005<br>(0.0002) | 0.0005<br>(0.0002) | <b>0.02</b>  | 0.0012<br>(0.0003) | 0.0012<br>(0.0002) | <b>0.00</b>  |
| <b>S5</b> | 9526                         | 9162  | <b>-0.0.2</b> | 0.50<br>(0.15) | 0.51<br>(0.14) | <b>0.01</b>  | 0.0008<br>(0.0002) | 0.0007<br>(0.0002) | <b>-0.05</b> | 0.0006<br>(0.0002) | 0.0005<br>(0.0002) | <b>-0.06</b> | 0.0013<br>(0.0003) | 0.0012<br>(0.0003) | <b>-0.04</b> |
| <b>S6</b> | No data                      |       |               | No data        |                |              | No data            |                    |              | No data            |                    |              | No data            |                    |              |
| <b>S7</b> | 15187                        | 9546  | <b>0.23</b>   | 0.54<br>(0.15) | 0.56<br>(0.14) | <b>-0.02</b> | 0.0007<br>(0.0001) | 0.0007<br>(0.0001) | <b>0.00</b>  | 0.0005<br>(0.0001) | 0.0005<br>(0.0002) | <b>0.00</b>  | 0.0012<br>(0.0002) | 0.0013<br>(0.0002) | <b>-0.04</b> |
| <b>S8</b> | 7189                         | 4296  | <b>0.25</b>   | 0.47<br>(0.15) | 0.40<br>(0.16) | <b>0.08</b>  | 0.0008<br>(0.0002) | 0.0010<br>(0.0004) | <b>-0.11</b> | 0.0006<br>(0.0003) | 0.0008<br>(0.0004) | <b>-0.14</b> | 0.0013<br>(0.0003) | 0.0014<br>(0.0005) | <b>-0.04</b> |

**B) fODF metrics**

|           | <b>AFDtotal</b> |                |              | <b>NuFO</b>    |                |              |
|-----------|-----------------|----------------|--------------|----------------|----------------|--------------|
|           | IML             | rML            | AI           | IML            | rML            | AI           |
| <b>S1</b> | 0.80<br>(0.31)  | 0.86<br>(0.39) | <b>-0.03</b> | 1.28<br>(0.51) | 1.25<br>(0.50) | <b>0.19</b>  |
| <b>S2</b> | 0.74<br>(0.33)  | 0.76<br>(0.30) | <b>0.01</b>  | 1.35<br>(0.59) | 1.61<br>(0.68) | <b>0.09</b>  |
| <b>S3</b> | 0.66<br>(0.27)  | 0.84<br>(0.29) | <b>-0.12</b> | 1.57<br>(0.67) | 1.24<br>(0.48) | <b>0.12</b>  |
| <b>S4</b> | 0.73<br>(0.28)  | 0.75<br>(0.31) | <b>-0.01</b> | 1.35<br>(0.57) | 1.42<br>(0.62) | <b>-0.02</b> |
| <b>S5</b> | 0.69<br>(0.31)  | 0.67<br>(0.27) | <b>-0.04</b> | 1.33<br>(0.57) | 1.41<br>(0.60) | <b>0.03</b>  |
| <b>S6</b> | No data         |                |              | No data        |                |              |
| <b>S7</b> | 0.87<br>(0.33)  | 0.93<br>(0.33) | <b>-0.03</b> | 1.23<br>(0.46) | 1.17<br>(0.41) | <b>0.03</b>  |
| <b>S8</b> | 0.75<br>(0.28)  | 0.66<br>(0.36) | <b>0.06</b>  | 1.39<br>(0.56) | 1.24<br>(0.51) | <b>0.06</b>  |

### C) NODDI metrics

|           | OD             |                |             | ICVF           |                |             | ISOVF          |                |              |
|-----------|----------------|----------------|-------------|----------------|----------------|-------------|----------------|----------------|--------------|
|           | IML            | rML            | AI          | IML            | rML            | AI          | IML            | rML            | AI           |
| <b>S1</b> | 0.16<br>(0.10) | 0.15<br>(0.11) | <b>0.03</b> | 0.62<br>(0.10) | 0.60<br>(0.11) | <b>0.01</b> | 0.10<br>(0.13) | 0.13<br>(0.16) | <b>-0.14</b> |
| <b>S2</b> | 0.16<br>(0.11) | 0.19<br>(0.10) | <b>0.09</b> | 0.51<br>(0.14) | 0.64<br>(0.11) | <b>0.12</b> | 0.13<br>(0.16) | 0.09<br>(0.10) | <b>-0.17</b> |
| <b>S3</b> | 0.20<br>(0.11) | 0.11<br>(0.10) | <b>0.27</b> | 0.60<br>(0.12) | 0.52<br>(0.16) | <b>0.08</b> | 0.11<br>(0.13) | 0.19<br>(0.23) | <b>-0.26</b> |
| <b>S4</b> | 0.17<br>(0.10) | 0.16<br>(0.09) | <b>0.02</b> | 0.61<br>(0.11) | 0.61<br>(0.10) | <b>0.00</b> | 0.12<br>(0.13) | 0.10<br>(0.11) | <b>0.05</b>  |
| <b>S5</b> | 0.15<br>(0.10) | 0.17<br>(0.10) | <b>0.06</b> | 0.54<br>(0.12) | 0.58<br>(0.10) | <b>0.03</b> | 0.13<br>(0.13) | 0.08<br>(0.11) | <b>-0.21</b> |
| <b>S6</b> | No data        |                |             | No data        |                |             | No data        |                |              |
| <b>S7</b> | 0.16<br>(0.10) | 0.14<br>(0.10) | <b>0.07</b> | 0.62<br>(0.10) | 0.57<br>(0.10) | <b>0.04</b> | 0.09<br>(0.10) | 0.07<br>(0.10) | <b>0.13</b>  |
| <b>S8</b> | 0.19<br>(0.10) | 0.19<br>(0.14) | <b>0.00</b> | 0.56<br>(0.12) | 0.49<br>(0.19) | <b>0.07</b> | 0.12<br>(0.17) | 0.18<br>(0.24) | <b>-0.20</b> |

Table S5. Overall results for left and right FPC tracts (lFPC, rFPC) for the participants. The mean value (and the standard deviation) is presented for the FA, MD, RD, AD, AFD totale and NuFO metrics. The total volume is indicated for each tract in mm<sup>3</sup>. The AI is computed between the controlesional and the ipsilesional side for each metric.

**A) Volume and DTI metrics**

|           | Volume (in mm <sup>3</sup> ) |       |              | FA             |                |              | MD                 |                     |              | RD                 |                    |              | AD                 |                    |              |
|-----------|------------------------------|-------|--------------|----------------|----------------|--------------|--------------------|---------------------|--------------|--------------------|--------------------|--------------|--------------------|--------------------|--------------|
|           | lFPC                         | rFPC  | AI           | lFPC           | rFPC           | AI           | lFPC               | rFPC                | AI           | lFPC               | rFPC               | AI           | lFPC               | rFPC               | AI           |
| <b>S1</b> | 10974                        | 2620  | <b>0.61</b>  | 0.53<br>(0.17) | 0.50<br>(0.17) | <b>0.03</b>  | 0.0007<br>(0.0001) | 0.0008<br>(0.0002)  | <b>-0.03</b> | 0.0005<br>(0.0001) | 0.0005<br>(0.0002) | <b>-0.04</b> | 0.0012<br>(0.0003) | 0.0012<br>(0.0003) | <b>-0.01</b> |
| <b>S2</b> | 185                          | 1542  | <b>0.79</b>  | 0.46<br>(0.14) | 0.52<br>(0.18) | <b>0.07</b>  | 0.0009<br>(0.0004) | 0.0007<br>(8.3E-05) | <b>-0.13</b> | 0.0007<br>(0.0004) | 0.0005<br>(0.0001) | <b>-0.18</b> | 0.0014<br>(0.0005) | 0.0012<br>(0.0002) | <b>-0.09</b> |
| <b>S3</b> | 7138                         | 13616 | <b>-0.31</b> | 0.48<br>(0.17) | 0.52<br>(0.17) | <b>-0.04</b> | 0.0008<br>(0.0004) | 0.0009<br>(0.0004)  | <b>-0.03</b> | 0.0006<br>(0.0004) | 0.0006<br>(0.0004) | <b>0.00</b>  | 0.0013<br>(0.0005) | 0.0014<br>(0.0005) | <b>-0.05</b> |
| <b>S4</b> | 7463                         | 15095 | <b>-0.34</b> | 0.49<br>(0.17) | 0.47<br>(0.16) | <b>0.02</b>  | 0.0008<br>(0.0003) | 0.0008<br>(0.0003)  | <b>0.00</b>  | 0.0005<br>(0.0003) | 0.0006<br>(0.0003) | <b>-0.01</b> | 0.0012<br>(0.0004) | 0.0012<br>(0.0004) | <b>0.01</b>  |
| <b>S5</b> | 159                          | 4557  | <b>0.93</b>  | 0.40<br>(0.17) | 0.49<br>(0.18) | <b>0.09</b>  | 0.0001<br>(0.0006) | 0.0008<br>(0.0002)  | <b>-0.13</b> | 0.0008<br>(0.0006) | 0.0005<br>(0.0002) | <b>-0.20</b> | 0.0014<br>(0.0007) | 0.0012<br>(0.0003) | <b>-0.07</b> |
| <b>S6</b> | No data                      |       |              | No data        |                |              | No data            |                     |              | No data            |                    |              | No data            |                    |              |
| <b>S7</b> | 1582                         | 2183  | <b>-0.16</b> | 0.49<br>(0.15) | 0.47<br>(0.16) | <b>0.02</b>  | 0.0008<br>(0.0002) | 0.0008<br>(0.0004)  | <b>0.0</b>   | 0.0005<br>(0.0002) | 0.0006<br>(0.0004) | <b>-0.09</b> | 0.0012<br>(0.0003) | 0.0013<br>(0.0005) | <b>-0.04</b> |
| <b>S8</b> | 1627                         | 444   | <b>0.57</b>  | 0.45<br>(0.17) | 0.39<br>(0.18) | <b>0.07</b>  | 0.0008<br>(0.0001) | 0.0015<br>(0.0014)  | <b>-0.30</b> | 0.0006<br>(0.0002) | 0.0013<br>(0.0012) | <b>-0.37</b> | 0.0012<br>(0.0003) | 0.0021<br>(0.0017) | <b>-0.27</b> |

### B) fODF metrics

|           | AFDtotal       |                |              | NuFO           |                |             |
|-----------|----------------|----------------|--------------|----------------|----------------|-------------|
|           | IFPC           | rFPC           | AI           | IFPC           | rFPC           | AI          |
| <b>S1</b> | 0.73<br>(0.37) | 0.73<br>(0.42) | <b>0.01</b>  | 1.33<br>(0.56) | 1.26<br>(0.52) | <b>0.03</b> |
| <b>S2</b> | 0.65<br>(0.37) | 0.73<br>(0.44) | <b>0.05</b>  | 1.56<br>(0.76) | 1.57<br>(0.74) | <b>0.00</b> |
| <b>S3</b> | 0.69<br>(0.37) | 0.76<br>(0.37) | <b>-0.05</b> | 1.56<br>(0.72) | 1.30<br>(0.57) | <b>0.09</b> |
| <b>S4</b> | 0.66<br>(0.34) | 0.62<br>(0.29) | <b>0.03</b>  | 1.64<br>(0.77) | 1.65<br>(0.78) | <b>0.00</b> |
| <b>S5</b> | 0.55<br>(0.31) | 0.65<br>(0.35) | <b>0.09</b>  | 1.55<br>(0.86) | 1.59<br>(0.71) | <b>0.01</b> |
| <b>S6</b> | No data        |                |              | No data        |                |             |
| <b>S7</b> | 0.70<br>(0.37) | 0.70<br>(0.38) | <b>0.0</b>   | 1.29<br>(0.53) | 1.27<br>(0.52) | <b>0.01</b> |
| <b>S8</b> | 0.62<br>(0.37) | 0.57<br>(0.40) | <b>0.04</b>  | 1.34<br>(0.65) | 1.01<br>(0.63) | <b>0.14</b> |

### C) NODDI metrics

|           | OD             |                |              | ICVF           |                |             | ISOVF          |                |              |
|-----------|----------------|----------------|--------------|----------------|----------------|-------------|----------------|----------------|--------------|
|           | IFPC           | rFPC           | AI           | IFPC           | rFPC           | AI          | IFPC           | rFPC           | AI           |
| <b>S1</b> | 0.17<br>(0.12) | 0.18<br>(0.12) | <b>-0.03</b> | 0.65<br>(0.12) | 0.61<br>(0.12) | <b>0.03</b> | 0.11<br>(0.10) | 0.13<br>(0.13) | <b>-0.08</b> |
| <b>S2</b> | 0.17<br>(0.13) | 0.20<br>(0.13) | <b>0.08</b>  | 0.55<br>(0.16) | 0.69<br>(0.12) | <b>0.11</b> | 0.17<br>(0.22) | 0.12<br>(0.08) | <b>-0.17</b> |
| <b>S3</b> | 0.20<br>(0.15) | 0.15<br>(0.12) | <b>0.14</b>  | 0.62<br>(0.17) | 0.58<br>(0.18) | <b>0.03</b> | 0.15<br>(0.19) | 0.16<br>(0.20) | <b>-0.03</b> |
| <b>S4</b> | 0.20<br>(0.14) | 0.20<br>(0.13) | <b>0.00</b>  | 0.62<br>(0.13) | 0.61<br>(0.12) | <b>0.01</b> | 0.12<br>(0.14) | 0.11<br>(0.15) | <b>0.04</b>  |
| <b>S5</b> | 0.27<br>(0.24) | 0.19<br>(0.12) | <b>-0.17</b> | 0.49<br>(0.23) | 0.60<br>(0.13) | <b>0.10</b> | 0.18<br>(0.28) | 0.11<br>(0.13) | <b>-0.24</b> |
| <b>S6</b> | No data        |                |              | No data        |                |             | No data        |                |              |
| <b>S7</b> | 0.20<br>(0.12) | 0.20<br>(0.13) | <b>0.0</b>   | 0.63<br>(0.13) | 0.60<br>(0.15) | <b>0.02</b> | 0.11<br>(0.14) | 0.12<br>(0.20) | <b>-0.04</b> |
| <b>S8</b> | 0.22<br>(0.13) | 0.29<br>(0.30) | <b>-0.14</b> | 0.57<br>(0.12) | 0.48<br>(0.29) | <b>0.09</b> | 0.10<br>(0.12) | 0.32<br>(0.35) | <b>-0.52</b> |

Table S6. Overall results for left and right CTF tracts (ICTF, rCTF) for the participants. The mean value (and the standard deviation) is presented for the FA, MD, RD, AD, AFD totale and NuFO metrics. The total volume is indicated for each tract in mm<sup>3</sup>. The AI is computed between the controlesional and the ipsilesional side for each metric.

**A) Volume and DTI metrics**

|           | Volume (in mm <sup>3</sup> ) |       |              | FA             |                |              | MD                 |                    |              | RD                 |                    |              | AD                 |                    |              |
|-----------|------------------------------|-------|--------------|----------------|----------------|--------------|--------------------|--------------------|--------------|--------------------|--------------------|--------------|--------------------|--------------------|--------------|
|           | ICTF                         | rCTF  | AI           | ICTF           | rCTF           | AI           | ICTF               | rCTF               | AI           | ICTF               | rCTF               | AI           | ICTF               | rCTF               | AI           |
| <b>S1</b> | 11537                        | 1244  | <b>0.81</b>  | 0.45<br>(0.15) | 0.41<br>(0.17) | <b>0.04</b>  | 0.0008<br>(0.0003) | 0.0011<br>(0.0008) | <b>-0.18</b> | 0.0006<br>(0.0003) | 0.0009<br>(0.0007) | <b>-0.21</b> | 0.0012<br>(0.0004) | 0.0016<br>(0.0010) | <b>-0.15</b> |
| <b>S2</b> | 410                          | 3001  | <b>0.76</b>  | 0.39<br>(0.16) | 0.34<br>(0.15) | <b>-0.06</b> | 0.0010<br>(0.0003) | 0.0009<br>(0.0006) | <b>-0.01</b> | 0.0008<br>(0.0004) | 0.0008<br>(0.0005) | <b>0.01</b>  | 0.0014<br>(0.0004) | 0.0013<br>(0.0007) | <b>-0.03</b> |
| <b>S3</b> | 3763                         | 7269  | <b>-0.32</b> | 0.35<br>(0.15) | 0.41<br>(0.16) | <b>-0.08</b> | 0.0009<br>(0.0006) | 0.0010<br>(0.0006) | <b>-0.05</b> | 0.0007<br>(0.0005) | 0.0008<br>(0.0006) | <b>-0.03</b> | 0.0013<br>(0.0007) | 0.0015<br>(0.0008) | <b>-0.08</b> |
| <b>S4</b> | 4756                         | 11150 | <b>-0.40</b> | 0.39<br>(0.15) | 0.41<br>(0.15) | <b>-0.02</b> | 0.0009<br>(0.0004) | 0.0008<br>(0.0003) | <b>0.04</b>  | 0.0007<br>(0.0004) | 0.0006<br>(0.0003) | <b>0.04</b>  | 0.0012<br>(0.0006) | 0.0012<br>(0.0004) | <b>0.03</b>  |
| <b>S5</b> | 938                          | 13791 | <b>0.87</b>  | 0.33<br>(0.13) | 0.43<br>(0.14) | <b>0.13</b>  | 0.0012<br>(0.0007) | 0.0008<br>(0.0003) | <b>-0.21</b> | 0.0010<br>(0.0006) | 0.0006<br>(0.0003) | <b>-0.26</b> | 0.0016<br>(0.0008) | 0.0012<br>(0.0004) | <b>-0.16</b> |
| <b>S6</b> | No data                      |       |              | No data        |                |              | No data            |                    |              | No data            |                    |              | No data            |                    |              |
| <b>S7</b> | 1796                         | 3951  | <b>-0.37</b> | 0.43<br>(0.15) | 0.44<br>(0.15) | <b>-0.01</b> | 0.0008<br>(0.0003) | 0.0008<br>(0.0004) | <b>0.0</b>   | 0.0006<br>(0.0002) | 0.0006<br>(0.0003) | <b>0.0</b>   | 0.0012<br>(0.0005) | 0.0013<br>(0.0005) | <b>-0.04</b> |
| <b>S8</b> | 10899                        | 2326  | <b>0.65</b>  | 0.41<br>(0.15) | 0.33<br>(0.14) | <b>0.11</b>  | 0.0008<br>(0.0003) | 0.0011<br>(0.0007) | <b>-0.16</b> | 0.0006<br>(0.0003) | 0.0009<br>(0.0007) | <b>-0.20</b> | 0.0012<br>(0.0004) | 0.0015<br>(0.0009) | <b>-0.11</b> |

**B) fODF metric**

|           | AFDtotal       |                |              | NuFO           |                |              |
|-----------|----------------|----------------|--------------|----------------|----------------|--------------|
|           | ICTF           | rCTF           | AI           | ICTF           | rCTF           | AI           |
| <b>S1</b> | 0.61<br>(0.29) | 0.63<br>(0.40) | <b>-0.01</b> | 1.45<br>(0.65) | 1.28<br>(0.66) | <b>0.06</b>  |
| <b>S2</b> | 0.52<br>(0.39) | 0.48<br>(0.27) | <b>-0.04</b> | 1.25<br>(0.59) | 1.61<br>(0.81) | <b>0.13</b>  |
| <b>S3</b> | 0.45<br>(0.27) | 0.54<br>(0.25) | <b>-0.09</b> | 1.82<br>(0.85) | 1.49<br>(0.75) | <b>0.10</b>  |
| <b>S4</b> | 0.49<br>(0.29) | 0.52<br>(0.28) | <b>-0.03</b> | 1.71<br>(0.81) | 1.80<br>(0.82) | <b>-0.02</b> |
| <b>S5</b> | 0.40<br>(0.21) | 0.51<br>(0.25) | <b>0.13</b>  | 1.47<br>(0.77) | 1.70<br>(0.77) | <b>0.07</b>  |
| <b>S6</b> | No data        |                |              | No data        |                |              |
| <b>S7</b> | 0.61<br>(0.36) | 0.63<br>(0.34) | <b>-0.02</b> | 1.41<br>(0.65) | 1.33<br>(0.62) | <b>0.03</b>  |
| <b>S8</b> | 0.57<br>(0.29) | 0.47<br>(0.31) | <b>0.10</b>  | 1.34<br>(0.64) | 1.12<br>(0.64) | <b>0.09</b>  |



### C) NODDI metrics

|           | OD             |                |              | ICVF           |                |             | ISOVF          |                |              |
|-----------|----------------|----------------|--------------|----------------|----------------|-------------|----------------|----------------|--------------|
|           | ICTF           | rCTF           | AI           | ICTF           | rCTF           | AI          | ICTF           | rCTF           | AI           |
| <b>S1</b> | 0.23<br>(0.13) | 0.25<br>(0.23) | <b>-0.04</b> | 0.60<br>(0.13) | 0.54<br>(0.21) | <b>0.05</b> | 0.12<br>(0.16) | 0.25<br>(0.30) | <b>-0.36</b> |
| <b>S2</b> | 0.21<br>(0.15) | 0.33<br>(0.20) | <b>0.22</b>  | 0.49<br>(0.20) | 0.57<br>(0.19) | <b>0.08</b> | 0.17<br>(0.18) | 0.18<br>(0.27) | <b>0.05</b>  |
| <b>S3</b> | 0.30<br>(0.18) | 0.21<br>(0.17) | <b>0.18</b>  | 0.53<br>(0.18) | 0.53<br>(0.20) | <b>0.00</b> | 0.15<br>(0.23) | 0.19<br>(0.27) | <b>-0.14</b> |
| <b>S4</b> | 0.26<br>(0.16) | 0.25<br>(0.14) | <b>0.02</b>  | 0.57<br>(0.16) | 0.57<br>(0.13) | <b>0.00</b> | 0.15<br>(0.22) | 0.12<br>(0.17) | <b>0.10</b>  |
| <b>S5</b> | 0.27<br>(0.24) | 0.23<br>(0.14) | <b>-0.08</b> | 0.44<br>(0.24) | 0.58<br>(0.13) | <b>0.14</b> | 0.27<br>(0.33) | 0.11<br>(0.16) | <b>-0.43</b> |
| <b>S6</b> | No data        |                |              | No data        |                |             | No data        |                |              |
| <b>S7</b> | 0.25<br>(0.14) | 0.23<br>(0.14) | <b>0.04</b>  | 0.59<br>(0.12) | 0.56<br>(0.15) | <b>0.03</b> | 0.10<br>(0.15) | 0.13<br>(0.20) | <b>-0.13</b> |
| <b>S8</b> | 0.25<br>(0.13) | 0.26<br>(0.21) | <b>-0.02</b> | 0.56<br>(0.12) | 0.43<br>(0.21) | <b>0.13</b> | 0.12<br>(0.16) | 0.21<br>(0.28) | <b>-0.27</b> |

Figure S1. Visualization of all the tracts automatically extract with RecobundleX, visualize with scil\_visualize\_bundle\_mosaic.py (REF). CC and CST are not presented in this mosaic. AC = anterior comissure, AF = arcuate fasciculus, CG = cingulum, FAT = frontal aslant tract, FPT = fronto-pontine tract, FX = fornix, IFOF = inferior fronto-occipital fasciculus, ILF = inferior longitudinal fasciculus, MCP = middle cerebellar peduncle, MdLF = middle longitudinal fascicle, OR\_ML = optic radiation and Meyer's loop, PC = posterior commissure, POPT = parieto-occipito pontine tract, SCP = superior cerebellar peduncle, SLF = superior longitudinal fasciculus, UF = Uncinate fasciculus.

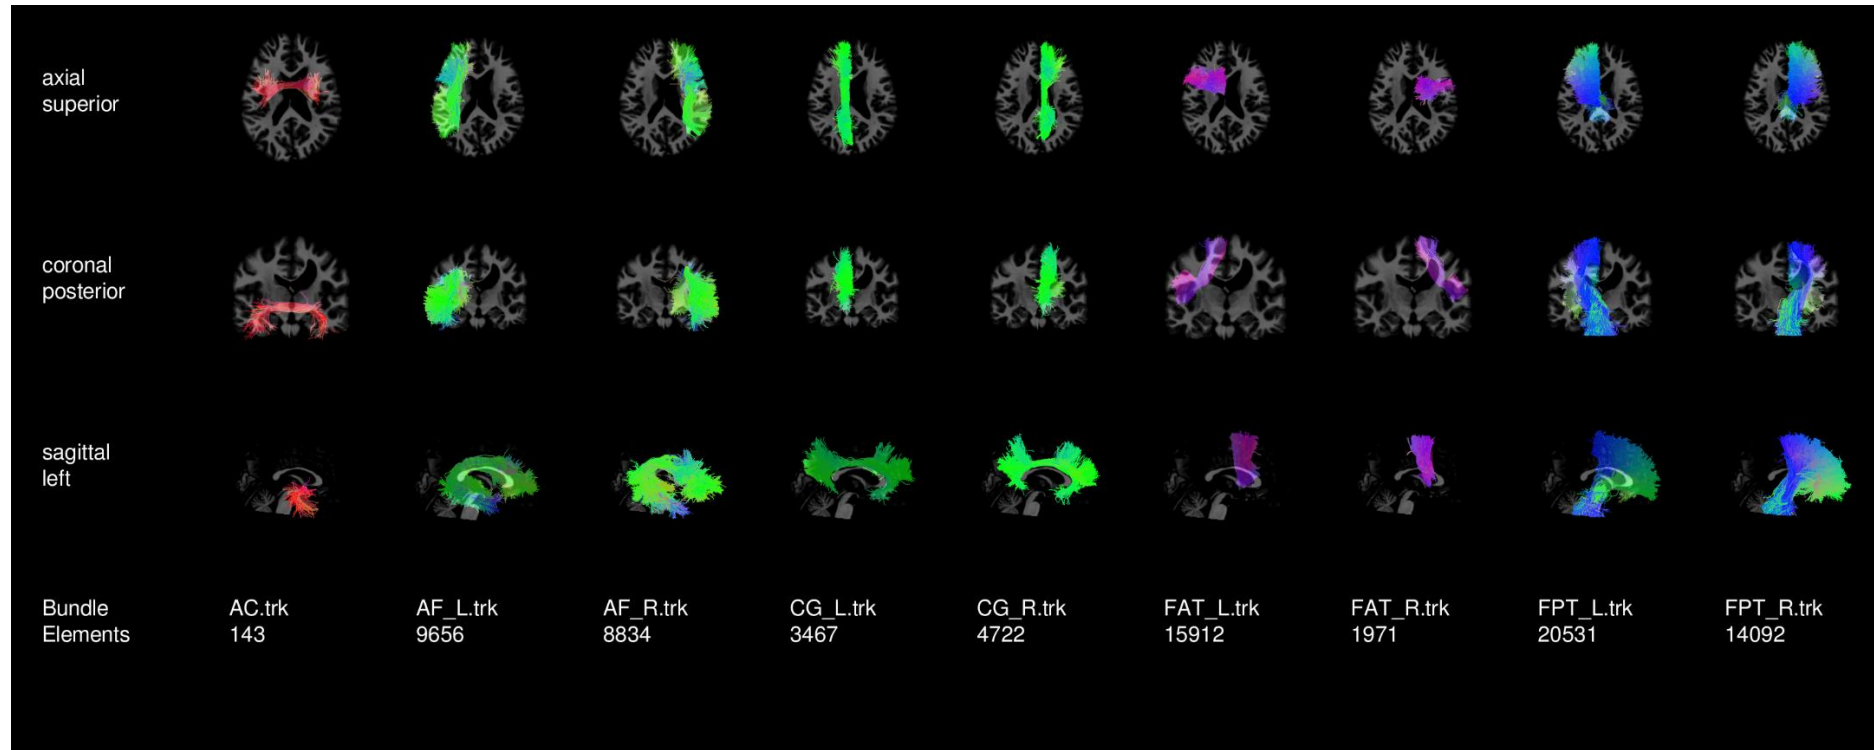

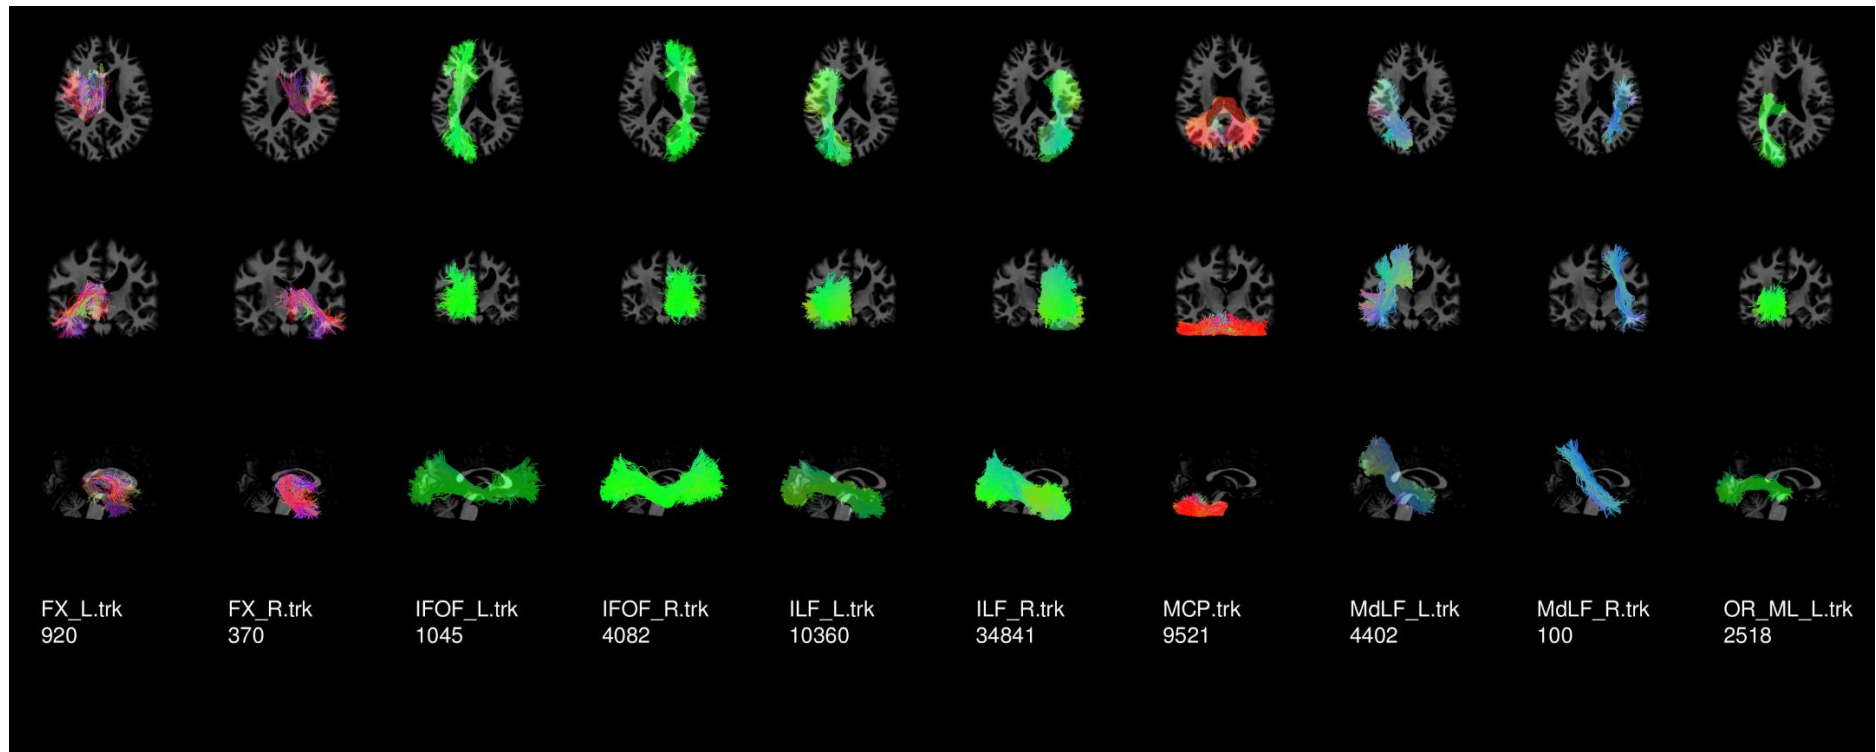

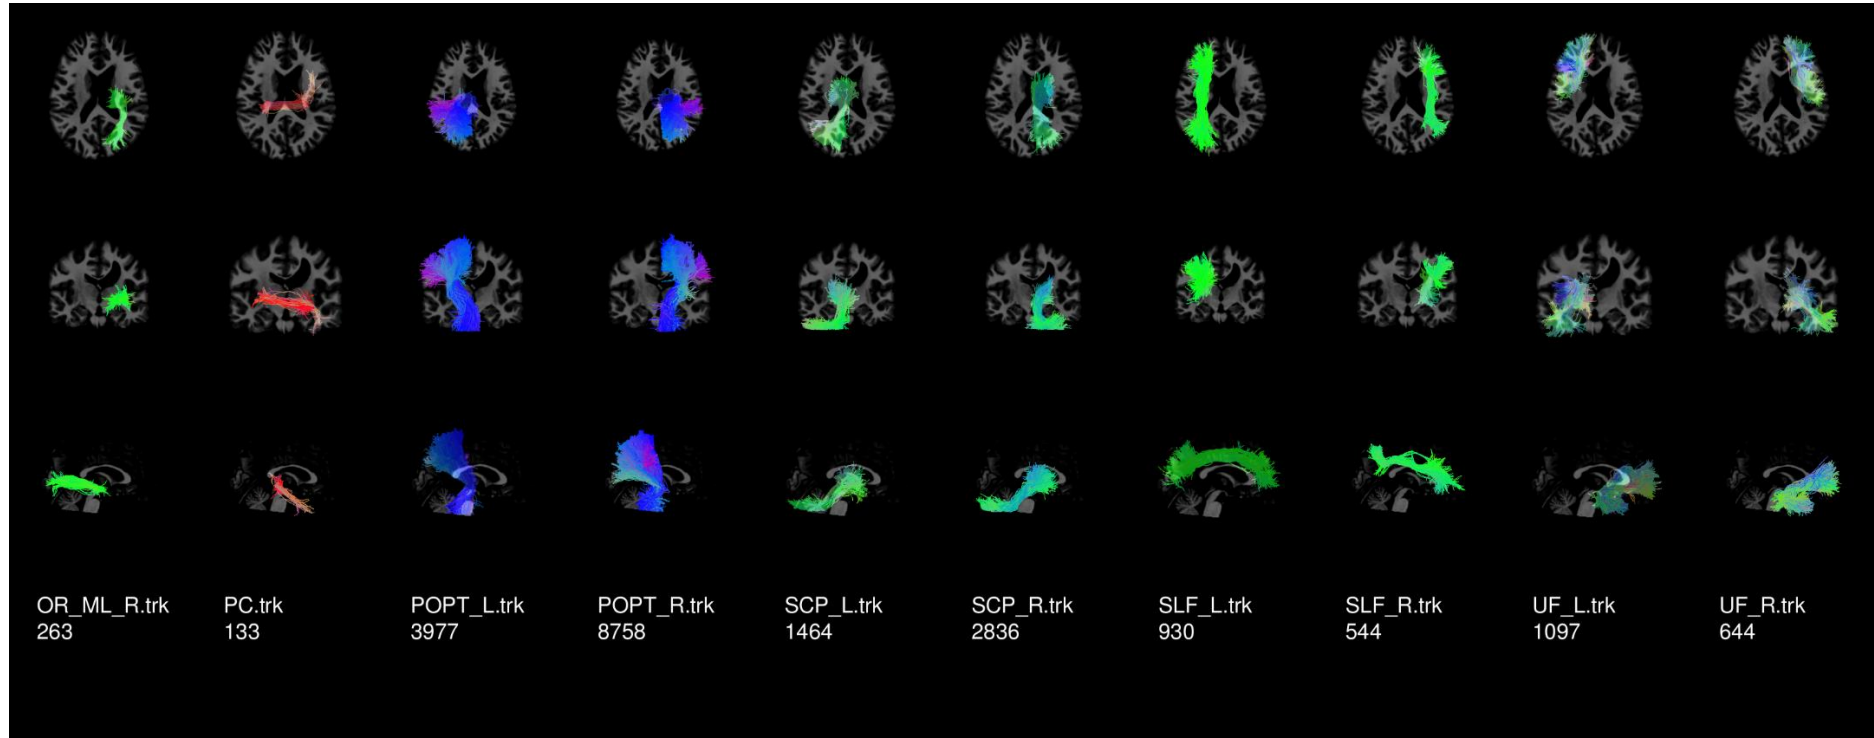

Supplement: s1 [file s1]
